# Supplementary material
Source: publisher figshare collection journal article supplement (https://acs.figshare.com/ndownloader/files/4154641)
Supplement: Supplementary file 1 [file 4154641]

# Fabrication of Mesoporous $\text{Co}_3\text{O}_4$ from LP-FDU-12 via Nanocasting Route and Effect of Wall/Pore Size on Their Magnetic Properties

*Hongxiao Jin,<sup>†</sup> Xiaojian Gu,<sup>†</sup> Bo Hong,<sup>†\*</sup> Langsheng Lin,<sup>‡</sup> Chiya Wang,<sup>†</sup> Dingfeng Jin,<sup>†</sup> Xiaoling*

*Peng,<sup>†</sup> Xinqing Wang<sup>‡</sup> and Hongliang Ge<sup>‡</sup>*

<sup>†</sup>Zhejiang Province Key Laboratory of Magnetism, College of Materials Science and Engineering,  
China Jiliang University, Hangzhou 310018, P. R. China

<sup>‡</sup>High Magnetic Field Laboratory, Chinese Academy of Sciences, Hefei 230031, China

\* To whom correspondence should be addressed. Tel: +86-571-8687-5600. Fax: +86-571-8687-5600.

E-mail: [Bohong@cjl.u.edu.cn](mailto:Bohong@cjl.u.edu.cn), [hongbo@mail.ustc.edu.cn](mailto:hongbo@mail.ustc.edu.cn).

## SUPPORT INFORMATION:

**Figure S1.** XRD patterns of calcined mesoporous silica LP-FDU-12 samples prepared with different synthesis temperature and treated with  $\text{H}_2\text{SO}_4$ .

**Figure S2.** TEM images of LP-FDU-12-100 sample.

**Figure S3.** Nitrogen physisorption and pore size distributions for calcined mesoporous silica LP-FDU-12 samples. The isotherms of FDU-12-100, FDU-12-130 and FDU-12-130H were given with an offset of 100, 320 and 500  $\text{cm}^3 \text{g}^{-1}$ , respectively.

**Figure S4.** Wide-angle powder XRD patterns for the mesoporous  $\text{Co}_3\text{O}_4$  samples.

**Figure S5.** HR-TEM image of  $\text{Co}_3\text{O}_4$ -80: the dash circles show the nanorods bridge connecting nanospheres.

**Figure S6.** Interconnectivity and mesoporous ordered domain size. TEM images of  $\text{Co}_3\text{O}_4$  samples: a)  $\text{Co}_3\text{O}_4$ -130; b) and c)  $\text{Co}_3\text{O}_4$ -100; D), E) and F)  $\text{Co}_3\text{O}_4$ -80.

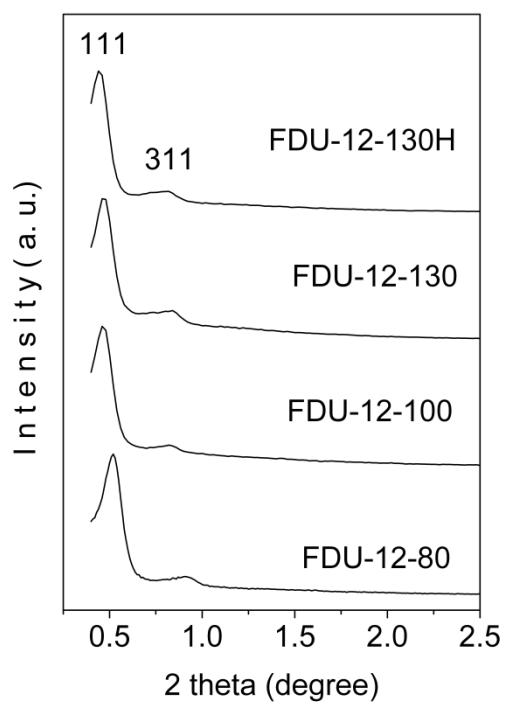

**Figure S1.** XRD patterns of calcined mesoporous silica LP-FDU-12 samples prepared with different synthesis temperature and treated with  $\text{H}_2\text{SO}_4$ .

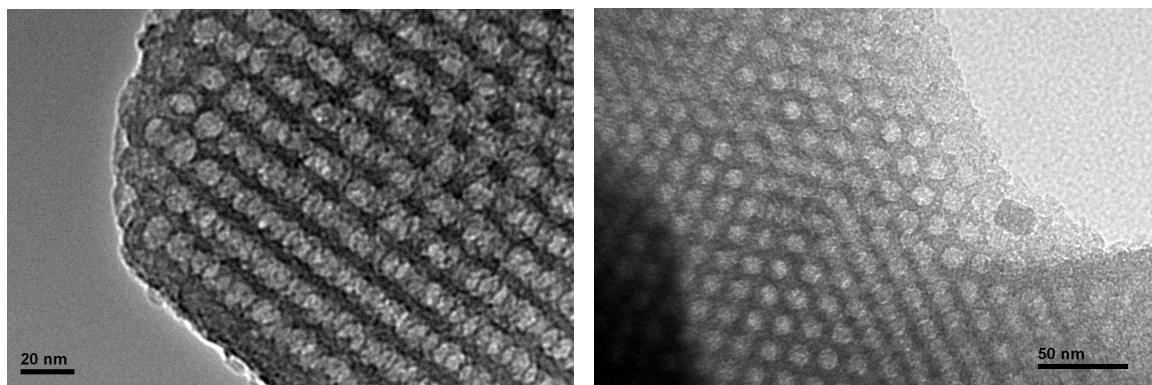

**Figure S2.** TEM images of LP-FDU-12-100 sample.

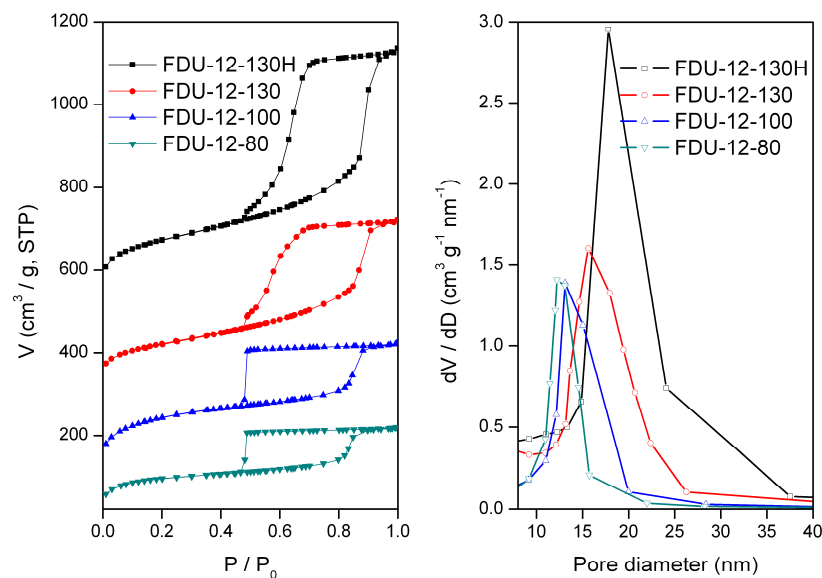

**Figure S3.** Nitrogen physisorption and pore size distributions for calcined mesoporous silica LP-FDU-12 samples. The isotherms of FDU-12-100, FDU-12-130 and FDU-12-130H were given with an offset of 100, 320 and 500  $\text{cm}^3 \text{g}^{-1}$ , respectively.

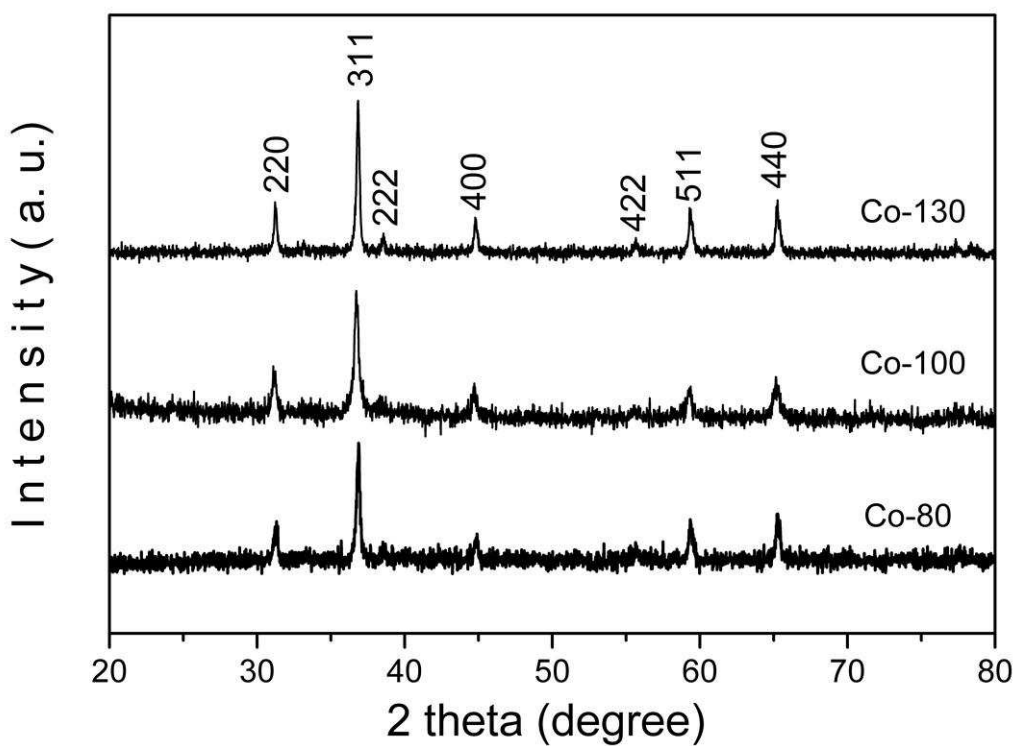

**Figure S4.** Wide-angle powder XRD patterns for the mesoporous  $\text{Co}_3\text{O}_4$  samples.

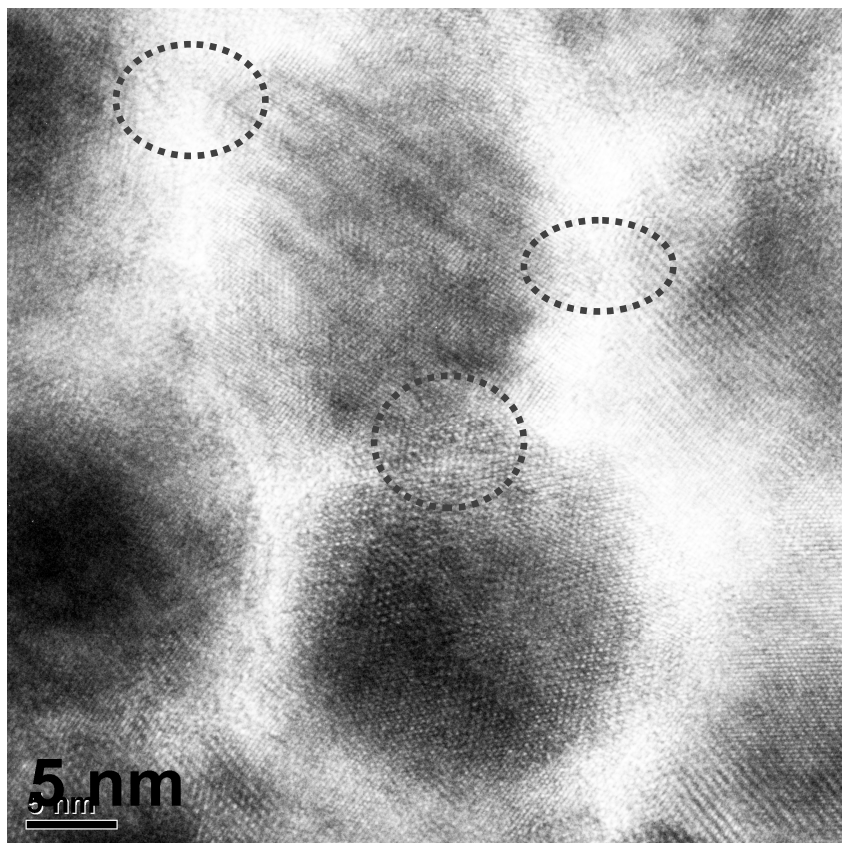

**Figure S5.** HR-TEM image of Co<sub>3</sub>O<sub>4</sub>-80: the dot circles show the nanorods bridge connecting nanospheres.



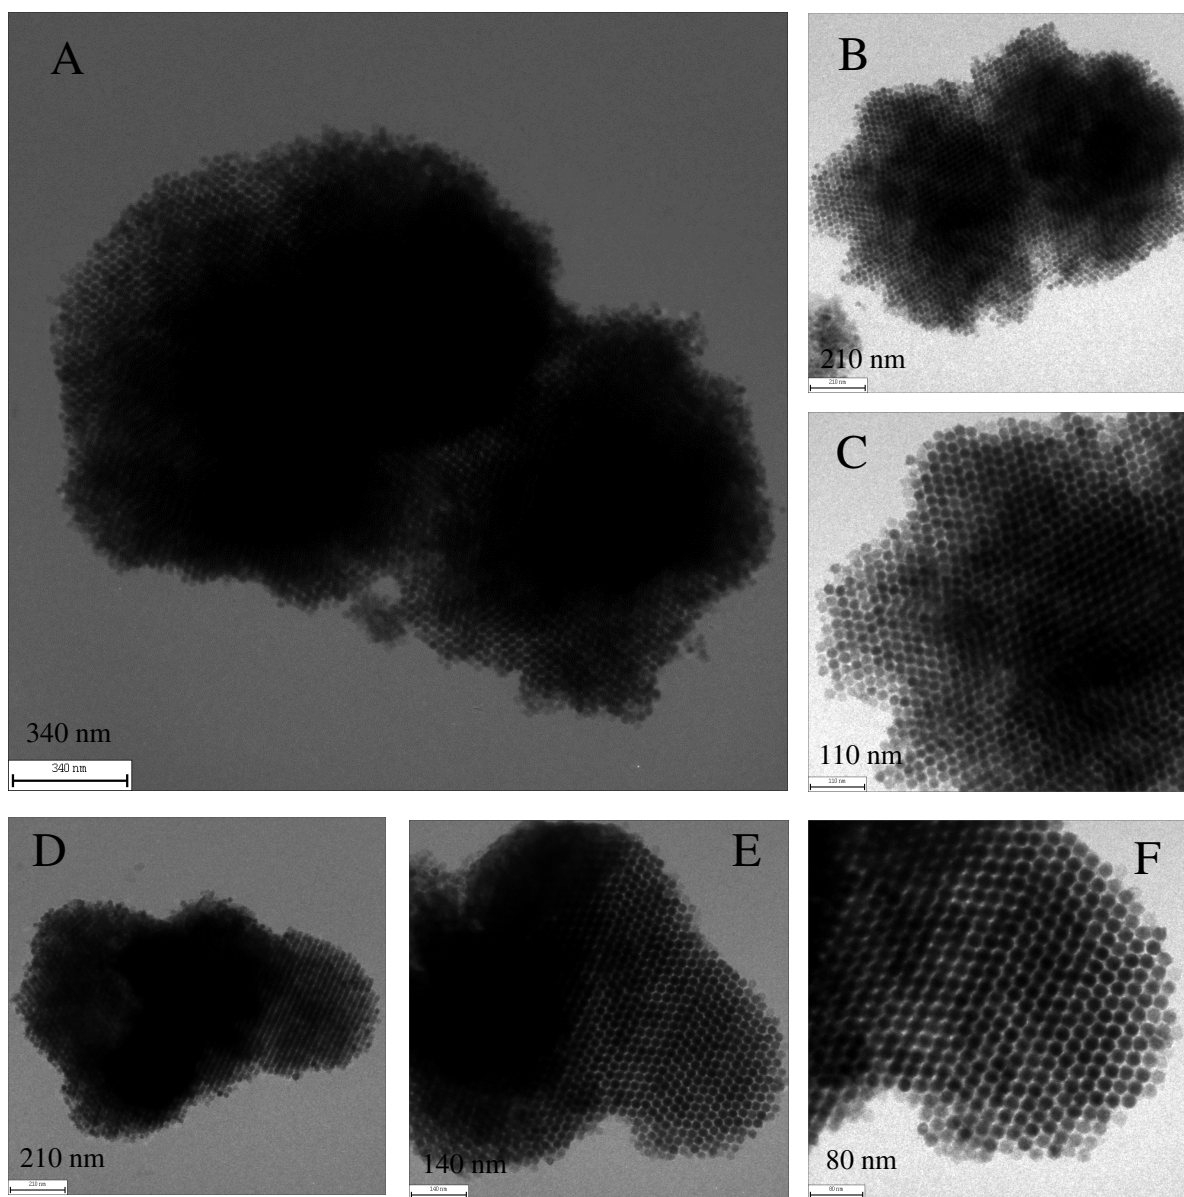

**Figure S6.** Interconnectivity and mesoporous ordered domain size. TEM images of  $\text{Co}_3\text{O}_4$  samples: a)  $\text{Co}_3\text{O}_4$ -130; b) and c)  $\text{Co}_3\text{O}_4$ -100; D), E) and F)  $\text{Co}_3\text{O}_4$ -80.
